# Supplementary material for: T cell receptor-Vβ repertoires in lung and blood CD4+ and CD8+ T cells of pulmonary sarcoidosis patients
Source: PubMed Central journal article supplement (PMC3997965; doi:10.1186/1471-2466-14-50), 2014-03-22

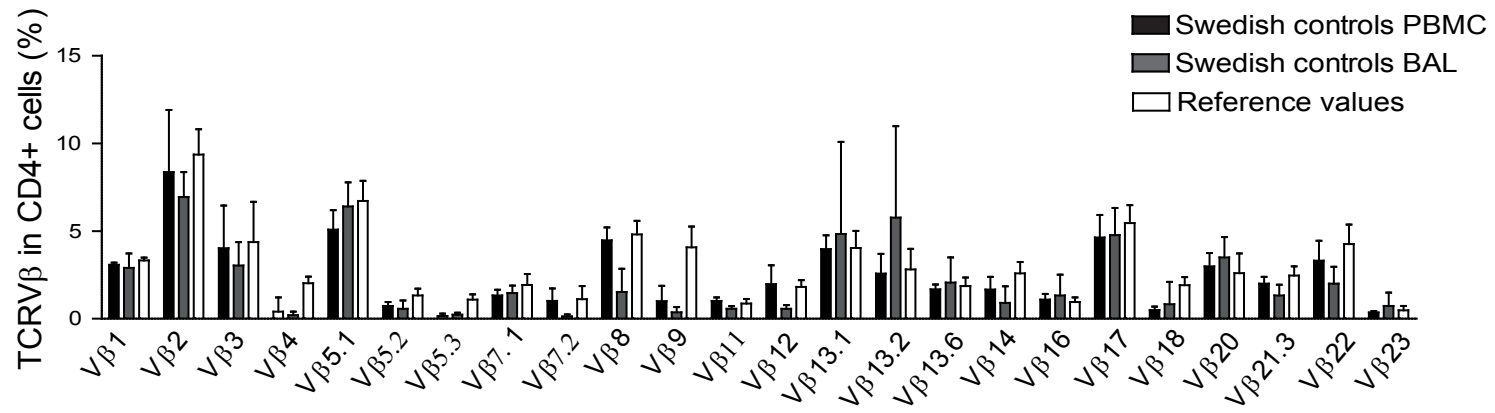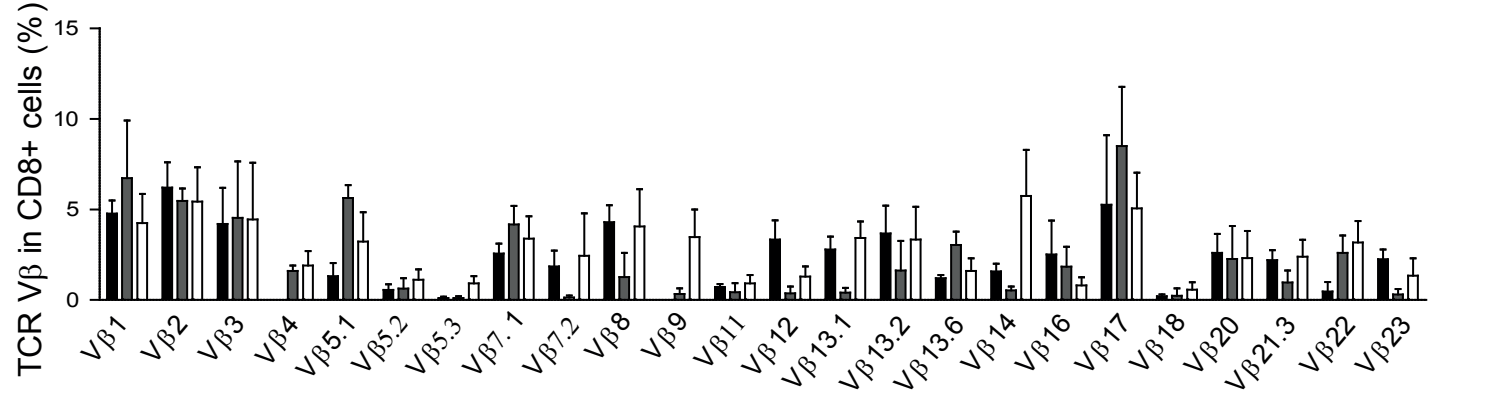

Supplement: 1471-2466-14-50-S1.pdf [file 1471-2466-14-50-S1.pdf]
